# Supplementary material
Source: publisher site journal article supplement (https://www.dovepress.com/get_supplementary_file.php?f=258170.docx)
Supplement: Supplementary file 1 [file get_supplementary_file.php]

**Supplementary Materials**


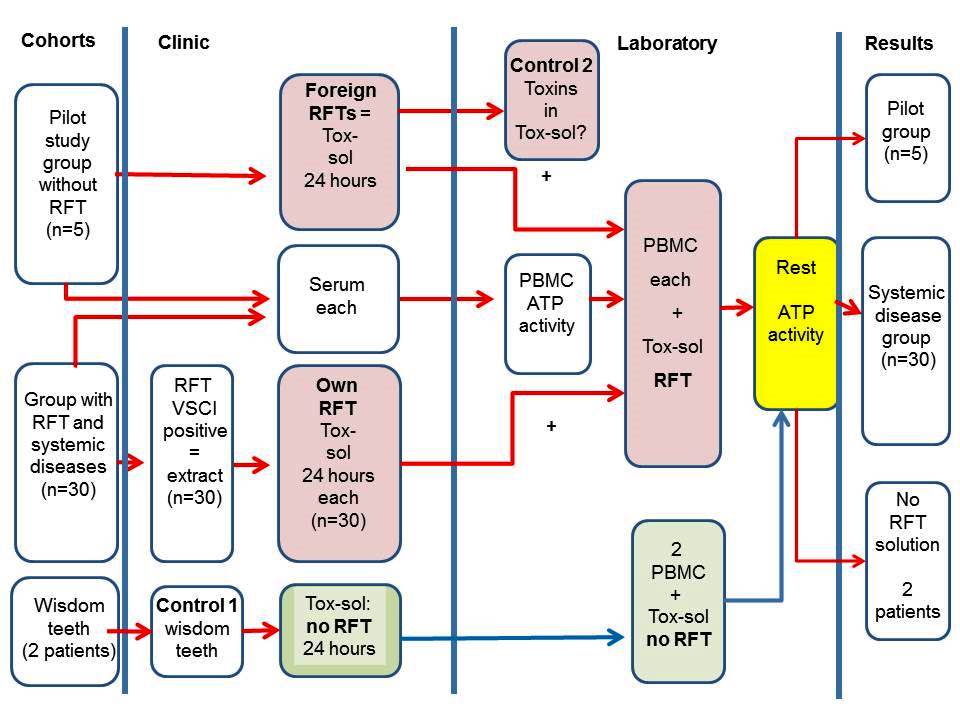


**Figure S1.** Overview of the study design.

**Abbreviations:** RFT, root-filled teeth; n, number; Tox-sol, toxin solution made by extracted RFT placed in an Aqua-Bidest solution at room temperature for 24 hours; VSCI, volatile sulfur compound indicator; PBMC, peripheral blood mononuclear cell; ATP activity, unrestricted mitochondrial membrane potential by Tox-sol.
